# Supplementary material
Source: PubMed Central journal article supplement (PMC10203967)
Supplement: jamacardiol-e231266-s002.pdf [file jamacardiol-e231266-s002.pdf]

## Data Sharing Statement

Pierce. Contemporary Use of Sodium-Glucose Cotransporter-2 Inhibitor Therapy Among Patients Hospitalized for Heart Failure With Reduced Ejection Fraction in the US. *JAMA Cardiol.* Published May 22, 2023. doi:10.1001/jamacardio.2023.1266

### Data

**Data available:** No
